# Supplementary material for: COVID-19 and its effects on endothelium in HIV-positive patients in sub-Saharan Africa: Cardiometabolic risk, thrombosis and vascular function (ENDOCOVID STUDY)
Source: Springer Nature journal article supplement (doi:10.1186/s12879-021-06426-8), 2021-07-31
Supplement: MOESM1 [file 19408504]

# Register

Study ID

---

# Demographics

---

---

## DEMOGRAPHICS

Firstname \_\_\_\_\_

Surname \_\_\_\_\_

House/Flat Number \_\_\_\_\_

Dwelling type  House  Flat or Complex  
 Informal housing

Building/Complex Name \_\_\_\_\_

Street name \_\_\_\_\_

Suburb \_\_\_\_\_

For how many years have you lived at current address?  
\_\_\_\_\_  
((months as decimal e.g. 6 months = 0.6))

Telephone number \_\_\_\_\_

# Medical Background

---



---

## MEDICAL BACKGROUND

### Past

- Have you had a heart attack in the past?  Yes  No
- Have you been diagnosed with cancer in the past?  Yes  No
- Have you previously had TB?  Yes  No
- If yes, when did you previously have TB?  
  
 (If patient cannot recall date, enter year (yyyy))
- Have you had a stroke in the past?  Yes  No

---



---

### Present

- Do you have high blood pressure (hypertension)?  Yes  No  Unknown
- If yes, what year were you first diagnosed?
- Do you have a heart disease?  Yes  No  Unknown
- If yes, what year were you diagnosed?
- Do you have high cholesterol?  Yes  No  Unknown
- If yes, what year were you diagnosed?
- Do you have any other long lasting health problems?  
 (For example: kidney stones, arthritis, asthma, bilharzia, malaria)  Yes  No
- If yes, please specify what the health problem is and what year you were diagnosed?
- Do you currently have pulmonary Tuberculosis (TB)?  Yes  No
- If yes, are you on treatment?  Yes  No
- When did you start treatment?  
  
 (If the patient cannot recall date, enter year (yyyy))

---



---

### Diabetes

- Do you have Diabetes  Yes  No
- What type of Diabetes do you have?  Type I Diabetes (also known as Juvenile Onset or Insulin Dependent Diabetes)  Type II Diabetes (also known as Non-insulin Dependent Diabetes)  Don't know

How long ago were you told you have diabetes?

- < 12 months  
 1-5 years  
 6-15 years  
 15+ years

Which of the following do you use to manage your diabetes?

- Diet  
 Pills  
 Injection  
 Nothing  
 Other  
 ((tick all that apply))

If other, please specify.

\_\_\_\_\_

## Family History

### Stroke And Heart Disease

|                                        | Don't know            | No                    | Yes, under the age of 60 | Yes, over the age of 60 | Yes, but I don't know the age |
|----------------------------------------|-----------------------|-----------------------|--------------------------|-------------------------|-------------------------------|
| Has your mother had any heart disease? | <input type="radio"/> | <input type="radio"/> | <input type="radio"/>    | <input type="radio"/>   | <input type="radio"/>         |
| Has your father had any heart disease? | <input type="radio"/> | <input type="radio"/> | <input type="radio"/>    | <input type="radio"/>   | <input type="radio"/>         |
| Has your mother ever had a stroke?     | <input type="radio"/> | <input type="radio"/> | <input type="radio"/>    | <input type="radio"/>   | <input type="radio"/>         |
| Has your father ever had a stroke?     | <input type="radio"/> | <input type="radio"/> | <input type="radio"/>    | <input type="radio"/>   | <input type="radio"/>         |

### Diabetes

|                                   | Don't know            | No                    | Yes, Type I           | Yes, Type II          | Yes, but I don't know type |
|-----------------------------------|-----------------------|-----------------------|-----------------------|-----------------------|----------------------------|
| Has your mother had any Diabetes? | <input type="radio"/> | <input type="radio"/> | <input type="radio"/> | <input type="radio"/> | <input type="radio"/>      |
| Has your father had any Diabetes? | <input type="radio"/> | <input type="radio"/> | <input type="radio"/> | <input type="radio"/> | <input type="radio"/>      |

### High Blood Pressure and Cholesterol

|                                          | No                    | Yes                   | Don't know            |
|------------------------------------------|-----------------------|-----------------------|-----------------------|
| Has your mother had high blood pressure? | <input type="radio"/> | <input type="radio"/> | <input type="radio"/> |
| Has your father had high blood pressure? | <input type="radio"/> | <input type="radio"/> | <input type="radio"/> |
| Has your mother had high cholesterol?    | <input type="radio"/> | <input type="radio"/> | <input type="radio"/> |
| Has your father had high cholesterol?    | <input type="radio"/> | <input type="radio"/> | <input type="radio"/> |

---

---

**HIV**

Are you HIV positive?  Yes  No

If positive, are you on ART?  Yes  No

Which line of ART are you on?  1st  2nd

What is the name of the ART? \_\_\_\_\_

For how long have you been on ART? \_\_\_\_\_

((weeks))

Date you were diagnosed with HIV? \_\_\_\_\_

If date unknown, how long ago approximately were you diagnosed with HIV

- In last year  
 2 - 5 years ago  
 >5 years ago  
 >15 years ago

---

---

**Family Planning**

Do you currently have a baby younger than 3 months?  Yes  No

Are you currently pregnant?  Yes  No  Not applicable

Are you currently breast feeding?  Yes  No

Are you on family planning?  Yes  No

---

---

**Medications**

Do you take any medications?  Yes  No

Which medications do you take?

- Beta blockers  
 Statins  
 Aspirin  
 Calcium channel blockers  
 ACE inhibitors  
 Other  
 Anti-inflammatory

If other, specify \_\_\_\_\_

What dosage of aspirin do you take? \_\_\_\_\_

(mg)

## General Data

Date subject signed consent

\_\_\_\_\_  
((dd-mm-yyyy))

Date and time start of interview

\_\_\_\_\_

Date of birth

\_\_\_\_\_

Age when signed consent

\_\_\_\_\_

Gender

Male  Female

Ethnicity

- Black  
 White  
 Coloured  
 Indian  
 Other (please specify)  
 Refused

Ethnicity other

\_\_\_\_\_

Please indicate the option that describes your current marital status.

- Never married  
 Married  
 Living together  
 Widowed  
 Separated or Divorced

Field site where patient was recruited

- Elsie's River  
 Ravensmead  
 Bishop Lavis  
 Durbanville  
 Uitsig  
 Adriaanse  
 Potchefstroom  
 Mthatha  
 Fisantekraal

Field worker taking interview

- Charmaine Abrahams  
 Shirley Mc Anda  
 Susan van Zyl

# Anthropometry

---



---

## ANTHROPOMETRY

Total body mass \_\_\_\_\_  
(kg)

Height \_\_\_\_\_  
(cm)

Body Mass Index (BMI) \_\_\_\_\_

Hip circumference \_\_\_\_\_  
(cm)

Waist circumference \_\_\_\_\_  
(cm)

Wasit to hip ratio \_\_\_\_\_

---



---

## BLOOD PRESSURE

Systolic \_\_\_\_\_

Diastolic \_\_\_\_\_

Arm  Left  
 Right

Heart Rate \_\_\_\_\_  
(bpm)

Systolic (2nd reading) \_\_\_\_\_

Diastolic (2nd reading) \_\_\_\_\_

Arm (2nd reading)  Left  
 Right

Heart rate (2nd reading) \_\_\_\_\_  
(bpm)

Systolic (3rd reading) \_\_\_\_\_

Diastolic (3rd reading) \_\_\_\_\_

Arm (3rd reading)  Left  
 Right

Heart Rate (3rd reading) \_\_\_\_\_  
(bpm)

Mean Blood Pressure \_\_\_\_\_

Mean Heart Rate \_\_\_\_\_

---

---

**URINE ANALYSIS (Dipstick Parameters)**

Glucose

- Normal
- 1+ 30
- 2+ 100
- 3+ 300
- 4+ 1000

Protein

- Negative
- 1+ 30
- 2+ 100
- 3+ 500

Leucocytes

- Negative
- 1+ ~10-25
- 2+ ~75
- 3+ ~500

Microalbuminuria

---



# Lifestyle

## Cigarette Smoking

Are you a smoker

- Yes currently     In the past  
 Never smoked

What type of cigarette do/did you smoke?

- Snuf     Tobacco     Dagga

On average, how many cigarettes do you smoke on the days that you smoke?

- More than 20 daily  
 Less than 20 daily

If you have stopped, how long has it been since you last smoked (months)?

\_\_\_\_\_

## Alcohol

Have you consumed an alcoholic drink within the past 12 months?

- Yes     No

How often do you typically drink ?

- Daily  
 8 or more days a month  
 Less than 8 days a month

At what age did you start drinking regularly (at least once a week)?

\_\_\_\_\_ ((answer in years))

## What do you drink?

|                                    | Yes                   | No                    |
|------------------------------------|-----------------------|-----------------------|
| Beer                               | <input type="radio"/> | <input type="radio"/> |
| Spirits (brandy, vodka, cane etc.) | <input type="radio"/> | <input type="radio"/> |
| Red Wine                           | <input type="radio"/> | <input type="radio"/> |
| White Wine                         | <input type="radio"/> | <input type="radio"/> |
| Other                              | <input type="radio"/> | <input type="radio"/> |

When you drink beer, how many standard units do you typically have on a single occasion? (see reference card).

\_\_\_\_\_

When you drink spirits, how many standard units do you typically have on a single occasion? (see reference card).

\_\_\_\_\_

When you drink red wine, how many standard units do you typically have on a single occasion? (see reference card).

\_\_\_\_\_

When you drink white wine, how many standard units do you typically have on a single occasion? (see reference card).

\_\_\_\_\_

When you drink other, how many standard units do you typically have on a single occasion? (see reference card) and describe.

\_\_\_\_\_

## Standard unit reference card

**1 standard drink=**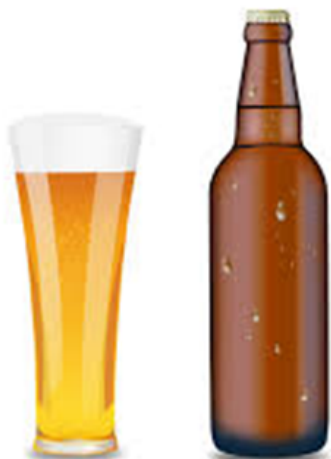

1 standard bottle  
or can of regular beer  
(340ml)

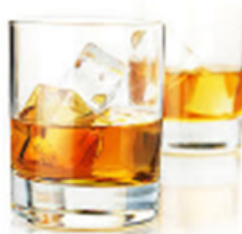

1 single measure of  
spirits (30ml)

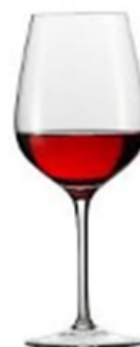

1 medium size  
glass of wine  
(120ml)

How many drinks do you have on a weekend?

- Less than 5     5 - 10  
 More than 10  
 (Friday night to Sunday night)

---

**Eating Habits**

How many meals do you have on a typical day?

- One  
 Two  
 Three  
 More than three

Do these meals include fruit and/or vegetables?

- Yes     No

---

**Exercise**

Are you physically active?

- Yes     No

If yes, how many times a week?

- Once  
 Twice  
 Three times  
 More than three times

How would you describe the type of exercise you do?

- Mild  
 Moderate  
 Intensive

---



---

**Environment**

In what type of environment do you live?

- City  
 Suburb  
 Countryside  
 Industrial  
 Other

If other, please specify

\_\_\_\_\_

Do you live on a main road?

- Yes  No

Where you live, do you

- Rent a room in a house  
 Rent a house/ self contained flat  
 Own house/ flat  
 Live with family  
 Not have a usual place to live  
 Live in a shelter (homeless)  
 Live separately (backyard/garden) on a property  
 Informal settlement (shack)

What type of fuel do you mostly use?

- Electricity  
 Wood  
 Parafin  
 Coal

What is your main source of water for drinking and cooking?

- Private connection to pipeline  
 Private well  
 Public taps/standpipe  
 Public well  
 Neighbours  
 Water vendor  
 Spring  
 River, stream, lake, pond  
 Rainwater  
 Bottled water  
 Other

---



---

**Sleeping Habits**

On average how many hours of sleep do you get in a 24hr period?

- 1-3 hours  
 3-6 hours  
 6-9 hours  
 > 9 hours

Do you currently do any shift work affecting your sleeping hours?

- Yes  No

How well do you sleep?

Bad Very well

=====

(Place a mark on the scale above)

---



---

**Rooibos Tea**

Do you drink Rooibos tea?

- Yes  No

How many cups do you drink on average day?

- 1 cup  
 2-3 cups  
 3-4 cups  
 >4 cups

How long have you drunk Rooibos regularly?

- Never
- Less than a year
- More than a year
- My whole life

How do you drink your Rooibos tea?

- Milk
- Honey
- Sugar
- Lemon

---

---

## Education

What level of education have you completed?

- None
- Primary school
- High school
- ABET (Adult Basic Education Training)
- College/University/Other tertiary institution  
(Tick all that apply)

---

---

## Employment

Which of the following applies to your current employment situation?

- Unemployed
- Employed (full time)
- Employed (part time)
- Self-employed

As someone who is unemployed, which of the following applies to you?

- Looking for work
- Discourage job seeker - not looking for work
- Student
- Homemaker
- Illness/disability prevent me to work
- Too old to work
- Other

If other, specify?

\_\_\_\_\_

---

---

## Income

Do you or someone in your household receive a Government Social Grant?

- Yes
- No

What is the total of your household income per month?

- less than R1,000
- R1,000 - R4,999
- R5,000 - R9,999
- R10,000 - R20,000
- more than R20,000

# Lab Sample Form

Sample Date \_\_\_\_\_

Sample Time \_\_\_\_\_  
(24 hr annotation)Time received (lab) \_\_\_\_\_  
((to be completed by lab staff))

Patient Date of Birth \_\_\_\_\_

Gender  Male  Female

---

---

**SAMPLES (also to be completed by field worker)**Has the patient been fasting for the visit?  Yes  No  UncertainBlood {Luminex} = [1x Serum (red cap) 3ml]  Done  Not Done  
 Under VolumeBlood {Glucose} = [1x Fluoride (grey cap 5ml)]  Done  Not Done  
 Under VolumeBlood {Lipogram & Creatinine} = [1x SST (yellow cap) 7ml]  Done  Not Done  
 Under VolumeBlood {Hemoglobin & HbA1C} = [1x EDTA (purple cap) 5ml]  Done  Not Done  
 Under VolumeBlood {Viral load} = [1 x EDTA (purple cap) 5ml]  Done  Not Done  
 Under VolumeBlood {buffy coat} = [1 x EDTA (purple cap) 10ml]  Done  Not Done  
 Under VolumeBlood {Coagulation factors} = [1 x Citrate (blue cap) 4.5ml]  Done  Not Done  
 Under VolumeBlood tubes inverted 8 times  Yes  NoUrine Collected {storage & microA} (approximately 40ml)  Yes  NoUrine Dipstick data completed  Yes  No

---

---

**HIV STATUS**HIV result  Positive  Negative  
 UnknownCD4 Count \_\_\_\_\_  
((from file))

# Lipid Profile

---

---

## LIPID PROFILE

Lipid sample taken

- Taken
- Not done (Supply issue)
- Not done (Too busy)
- Not done (Refused)
- Not done (Other reason)

Date lipid sample taken

\_\_\_\_\_

Total cholesterol

\_\_\_\_\_

HDL

\_\_\_\_\_

LDL

\_\_\_\_\_

Triglycerides

\_\_\_\_\_

If flags reported, comment

\_\_\_\_\_

# Blood Profile

---

---

## BLOOD PROFILE

Blood for profile taken

- Taken
- Not done (Supply issue)
- Not done (Too busy)
- Not done (Refused)
- Not done (Other reason)

Fasting glucose

\_\_\_\_\_

HbA1c result

\_\_\_\_\_

(% (1 decimal))

If HbA1c flag reported, comment

\_\_\_\_\_

CRP

\_\_\_\_\_

GGT

\_\_\_\_\_

---

---

## FULL BLOOD COUNT

Haemoglobin

\_\_\_\_\_

(g/dl (1 decimal))

CD4 count (from patient folder at clinic)

\_\_\_\_\_

CD4 count (EndoAfrica result)

\_\_\_\_\_

Viral Load

\_\_\_\_\_

If FBC flags, comment

\_\_\_\_\_

# Creatinine

Creatinine sample taken

- Taken
- Not done (Supply issue)
- Not done (Too busy)
- Not done (Refused)
- Not done (Other reason)

Creatinine level

\_\_\_\_\_

( $\mu$ mol/L (1 decimal))

MDRD eGFR result

\_\_\_\_\_

If flags reported, comment

\_\_\_\_\_



## Exclusion

This patient is pregnant. Do not include.

This patient has a baby of 3 months of age or younger. Do not include.

This patient is under 18 year of age. Do not include.

This patient's Hb is too low. Consider for exclusion.

This patient is on 2nd line ART. Consider for exclusion.

Exclude this subject?

Yes  No

Comments

---

# Flow Mediated Dilatation

FMD files

Operator? \_\_\_\_\_

Diameter baseline \_\_\_\_\_

\_\_\_\_\_  
((mm))

Diameter max \_\_\_\_\_

\_\_\_\_\_  
((mm))

Diameter recovery \_\_\_\_\_

FMD Percentage \_\_\_\_\_

\_\_\_\_\_  
((%))

SR baseline \_\_\_\_\_

SR max \_\_\_\_\_

Comments \_\_\_\_\_

SR Area (u.a.) \_\_\_\_\_

SR AreatoMax (u.a.) \_\_\_\_\_

# Retinal Imagery Studies

RIS

RIS2

# Serum Biomarkers

Multiplex
